# Supplementary material for: Comparison of Sources and Methods for the Isolation of Equine Adipose Tissue-Derived Stromal/Stem Cells and Preliminary Results on Their Reaction to Incubation with 5-Azacytidine
Source: MDPI journal article supplement (doi:10.3390/ani12162049), 2022-08-11
Supplement: s1 [file s1]

Supplementary Table S1. Study collective.

| Animal number | Breed                     | Age      | Sex      | Type of death | Medical diagnosis<br>(if known)    |
|---------------|---------------------------|----------|----------|---------------|------------------------------------|
| Horse 1       | Mini Shetland Pony        | 5 years  | gelding  | euthanasia    | colic                              |
| Horse 2       | Pura Raza Española        | 1 day    | mare     | euthanasia    | neonatal +<br>orthopedic disease   |
| Horse 3       | American Quarter<br>Horse | 5 years  | gelding  | euthanasia    | orthopedic +<br>neurologic disease |
| Horse 4       | Fjord Horse               | 25 years | gelding  | slaughter     | -                                  |
| Horse 5       | Icelandic Horse           | 23 years | gelding  | euthanasia    | colic                              |
| Horse 6       | Warmblood                 | 5 years  | stallion | slaughter     | -                                  |
| Horse 7       | German Riding Pony        | 5 years  | stallion | euthanasia    | orthopedic disease                 |
| Horse 8       | American Quarter<br>Horse | 26 years | gelding  | slaughter     | -                                  |
| Horse 9       | American Quarter<br>Horse | 14 years | mare     | slaughter     | -                                  |
| Horse 10      | Warmblood                 | 3 months | mare     | euthanasia    | orthopedic disease                 |
| Horse 11      | Warmblood                 | 23 years | gelding  | euthanasia    | tumor disease                      |
| Horse 12      | Shire Horse               | 16 years | gelding  | euthanasia    | colic                              |
| Horse 13      | Warmblood                 | 13 years | mare     | euthanasia    | colic                              |
| Horse 14      | Warmblood                 | 14 years | gelding  | euthanasia    | viral infection<br>disease         |
| Horse 15      | Shetland Pony             | 23 years | gelding  | euthanasia    | colic                              |
| Horse 16      | Arabian-Mix               | 12 years | gelding  | euthanasia    | orthopedic disease                 |
