# Supplementary material for: Comparison of Sources and Methods for the Isolation of Equine Adipose Tissue-Derived Stromal/Stem Cells and Preliminary Results on Their Reaction to Incubation with 5-Azacytidine
Source: MDPI journal article supplement (doi:10.3390/ani12162049), 2022-08-11

**Supplementary Figure S1** Gating strategies applied for the characterization of equine adipose tissue-derived mesenchymal stem cells (ASCs) by flow cytometry. EXP, explant method; FSC, forward scatter; PBMC, peripheral blood mononuclear cells; SSC, side scatter.

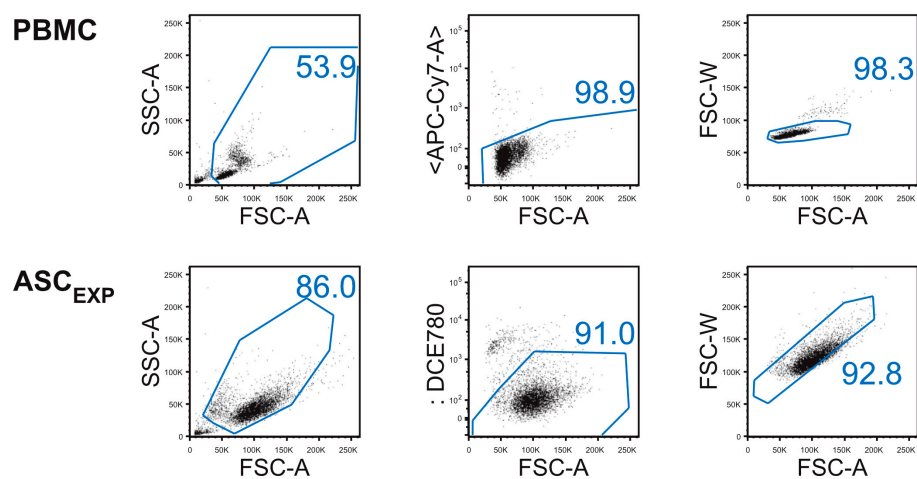

Supplement: s1 [file s1]
