# Supplementary material for: Comparison of Sources and Methods for the Isolation of Equine Adipose Tissue-Derived Stromal/Stem Cells and Preliminary Results on Their Reaction to Incubation with 5-Azacytidine
Source: MDPI journal article supplement (doi:10.3390/ani12162049), 2022-08-11
Supplement: s1 [file s1]

**Supplementary Table S2: Numeric results of the real time quantitative PCR before and after exposition to 5-azacytidine.** The experiments were performed with 5 donor horses in two independent repetitions. **(A)** Ct values were measured in triplets and shown as mean  $\pm$  standard deviation. **(B)** Parameter estimates (with robust standard errors) are demonstrated for OCT4/POU5F1 and MYC. For these two pluripotency markers an one-way ANOVA has been performed, as Ct mean values from T0, T3\_nc, T3\_ind were more than 4 cycles away from the mean values of NRT and H20. Afterwards, Tukey-HSD (OCT4/POU5F1) and Hochberg (MYC) post hoc tests were performed. **Abbreviations:** T0: day 0, T3: after 3 weeks, nc: negative control, ind: 5-azacytidine induction, p: positive control, NRT: non-reverse transcriptase, IRC: internal run control, GAPDH: glyceraldehyde 3 phosphate dehydrogenase.

(A)

| Treatment | OCT4/POU5F1      | MYC              | GATA4            | NKX2.5           | TNNI3            | MYH6             | MYH7             | MYF6             |
|-----------|------------------|------------------|------------------|------------------|------------------|------------------|------------------|------------------|
| T0        | 28,26 $\pm$ 0,97 | 21,86 $\pm$ 0,35 | 32,52 $\pm$ 1,15 | 37,22 $\pm$ 0,71 | 30,83 $\pm$ 0,80 | 36,58 $\pm$ 1,49 | 34,95 $\pm$ 1,29 | 33,40 $\pm$ 1,57 |
| T3-nc     | 29,74 $\pm$ 0,97 | 22,39 $\pm$ 0,62 | 34,14 $\pm$ 2,02 | 37,01 $\pm$ 0,94 | 32,59 $\pm$ 1,23 | 33,55 $\pm$ 0,49 | 35,53 $\pm$ 1,53 | 34,21 $\pm$ 1,60 |
| T3-ind    | 29,59 $\pm$ 2,00 | 22,59 $\pm$ 1,07 | 33,59 $\pm$ 1,90 | 36,02 $\pm$ 1,91 | 32,32 $\pm$ 2,05 | 35,20 $\pm$ 1,57 | 34,39 $\pm$ 1,54 | 33,03 $\pm$ 2,31 |
| p         | 28,53 $\pm$ 0,50 | 21,70 $\pm$ 0,30 | 26,83 $\pm$ 0,27 | 30,50 $\pm$ 0,15 | 16,28 $\pm$ 0,36 | 18,03 $\pm$ 0,20 | 18,65 $\pm$ 0,53 | 20,85 $\pm$ 0,45 |
| NRT       | 34,85 $\pm$ 2,34 | 33,85 $\pm$ 1,71 | 36,70 $\pm$ 1,00 | 35,30 $\pm$ 0,00 | 32,23 $\pm$ 0,59 | 35,10 $\pm$ 3,53 | 34,70 $\pm$ 0,46 | 38,00 $\pm$ 4,11 |
| H20       | 33,73 $\pm$ 0,90 | 33,77 $\pm$ 1,40 | 32,58 $\pm$ 2,15 | 37,30 $\pm$ 1,27 | 34,65 $\pm$ 1,50 | 37,80 $\pm$ 1,75 | 35,45 $\pm$ 0,83 | 34,55 $\pm$ 1,99 |
| IRC-GAPDH | 17,25 $\pm$ 0,16 | 17,47 $\pm$ 0,27 | 17,50 $\pm$ 0,30 | 17,42 $\pm$ 0,47 | 17,43 $\pm$ 0,26 | 17,32 $\pm$ 0,28 | 17,48 $\pm$ 0,17 | 17,25 $\pm$ 0,12 |

(B)

MYC

parameter estimates with robust standard errors:

dependent variable: MYC (Ct value)

| parameter                                    | regression<br>coefficient B | p value | 95% confidence interval |             |
|----------------------------------------------|-----------------------------|---------|-------------------------|-------------|
|                                              |                             |         | lower limit             | upper limit |
| constant term                                | 22,133                      | 0       | 21,556                  | 22,711      |
| [treatment T0]                               | -0,373                      | 0,218   | -0,971                  | 0,224       |
| [treatment T3-nc]                            | 0,107                       | 0,76    | -0,586                  | 0,799       |
| [treatment T3_ind]                           | 0                           | .       | .                       | .           |
| [exp.trial=1]                                | 0,92                        | 0,015   | 0,182                   | 1,658       |
| [exp.trial =2]                               | 0                           | .       | .                       | .           |
| [treatment T0] * [exp.trial=1]               | -0,72                       | 0,07    | -1,5                    | 0,06        |
| [treatment T0] * [exp.trial=2]               | 0                           | .       | .                       | .           |
| [treatment T3-nc] * [exp.trial=1]            | -0,613                      | 0,163   | -1,481                  | 0,254       |
| [treatment T3-nc] * [exp.trial=2]            | 0                           | .       | .                       | .           |
| [treatment T3_ind] *                         |                             |         |                         |             |
| [exp.trial=1]                                | 0                           | .       | .                       | .           |
| [treatment T3_ind] *                         |                             |         |                         |             |
| [exp.trial=2]                                | 0                           | .       | .                       | .           |
| R square = 0,283 (adjusted R square = 0,240) |                             |         |                         |             |

OCT4/POU5F1

parameter estimates:

dependent variable: OCT4/POU5F1 (Ct value)

| parameter                                    | regression<br>coefficient B | p value | 95% confidence interval |             |
|----------------------------------------------|-----------------------------|---------|-------------------------|-------------|
|                                              |                             |         | lower limit             | upper limit |
| constant term                                | 30,067                      | 0       | 29,364                  | 30,77       |
| [treatment T0]                               | -1,66                       | 0,001   | -2,654                  | -0,666      |
| [treatment T3-nc]                            | -0,78                       | 0,123   | -1,774                  | 0,214       |
| [treatment T3_ind]                           | 0                           | .       | .                       | .           |
| [exp.trial=1]                                | -0,953                      | 0,06    | -1,948                  | 0,041       |
| [exp.trial =2]                               | 0                           | .       | .                       | .           |
| [treatment T0] * [exp.trial=1]               | 0,653                       | 0,358   | -0,753                  | 2,06        |
| [treatment T0] * [exp.trial=2]               | 0                           | .       | .                       | .           |
| [treatment T3-nc] * [exp.trial=1]            | 1,86                        | 0,01    | 0,454                   | 3,266       |
| [treatment T3-nc] * [exp.trial=2]            | 0                           | .       | .                       | .           |
| [treatment T3_ind] *                         |                             |         |                         |             |
| [exp.trial=1]                                | 0                           | .       | .                       | .           |
| [treatment T3_ind] *                         |                             |         |                         |             |
| [exp.trial=2]                                | 0                           | .       | .                       | .           |
| R square = 0,254 (adjusted R square = 0,210) |                             |         |                         |             |
